# Supplementary material for: Cardiac Reversibility and Survival After Transcatheter Aortic Valve Implantation in Patients With Low‐Gradient Aortic Stenosis
Source: PubMed Central journal article supplement — J Am Heart Assoc. 2023 Aug 10;12(16):e029717. doi: 10.1161/JAHA.123.029717 (PMC10492952; doi:10.1161/jaha.123.029717), 2023-08-10
Supplement: JAH3-12-e029717-s001.pdf [file JAH3-12-e029717-s001.pdf]

# **SUPPLEMENTAL MATERIAL**

**Table S1. Characteristics and echocardiographic variables according to the flow and gradient state in reduced LVEF (N=227).**

|                                 | <b>LF-LG</b><br>N=52 (23%) | <b>NF-LG</b><br>N=48 (21%) | <b>LF-HG</b><br>N=51 (22%) | <b>NF-HG</b><br>N=76 (33%) | <b>P-</b><br><b>value</b> |
|---------------------------------|----------------------------|----------------------------|----------------------------|----------------------------|---------------------------|
| <b>Age, years</b>               | 84 (79-89)                 | 83 (78-87)                 | 85 (82-89)*                | 86 (82-89)*                | 0.013                     |
| <b>Male sex, n (%)</b>          | 24 (46)                    | 20 (42)                    | 19 (37)                    | 32 (42)                    | 0.840                     |
| <b>BSA, cm<sup>2</sup></b>      | 1.41 (1.33-1.53)           | 1.42 (1.26-1.56)           | 1.41 (1.30-1.51)           | 1.43 (1.28-1.58)           | 0.875                     |
| <b>STS PROM, %</b>              | 8.5 (5.5-15.6)             | 7.6 (4.6-10.9)             | 8.4 (5.6-11.5)             | 7.8 (5.4-10.8)             | 0.587                     |
| <b>NYHA class III/IV, n (%)</b> | 30 (58)                    | 24 (50)                    | 34 (67)                    | 41 (54)                    | 0.362                     |
| <b>Hemoglobin, g/dl</b>         | 11.4 (10.6-13.0)           | 10.5 (9.4-12.4)            | 11.7 (10.7-13.0)           | 11.3 (10.1-12.5)           | 0.061                     |
| <b>BNP, pg/ml</b>               | 774 (412-1210)*            | 362 (218-716)              | 825 (474-1556)*            | 704 (330-1213)*            | 0.003                     |
| <b>AF, n (%)</b>                | 9 (17)                     | 6 (13)                     | 11 (22)                    | 9 (12)                     | 0.444                     |
| <b>CHF, n (%)</b>               | 42 (81)                    | 36 (75)                    | 45 (88)                    | 64 (84)                    | 0.351                     |
| <b>CAD, n (%)</b>               | 28 (54)                    | 26 (54)                    | 14 (28)*#                  | 26 (34)                    | 0.007                     |
| <b>Prior MI, n (%)</b>          | 12 (23)                    | 10 (21)                    | 4 (8)                      | 10 (13)                    | 0.122                     |
| <b>LVEDV, ml</b>                | 120 (87-154)               | 127 (101-161)              | 103 (84-133)               | 121 (91-144)               | 0.117                     |
| <b>LVESV, ml</b>                | 80 (52-111)                | 70 (57-97)                 | 57 (45-84)                 | 70 (51-83)                 | 0.060                     |
| <b>LVEF, %</b>                  | 35 (27-41)*                | 41 (36-45)                 | 41 (35-45)#                | 43 (37-47)#                | <0.001                    |
| <b>LVSVi, ml/m<sup>2</sup></b>  | 29 (25-32)*                | 41 (38-46)                 | 30 (24-33)*                | 43 (38-52)\$#              | <0.001                    |
| <b>LV mass</b>                  | 135 (108-165)              | 138 (115-175)              | 142 (123-173)              | 150 (126-183)              | 0.221                     |

|                                           |                   |                  |                    |                     |        |
|-------------------------------------------|-------------------|------------------|--------------------|---------------------|--------|
| <b>index, g/m<sup>2</sup></b>             |                   |                  |                    |                     |        |
| <b>LAD, mm</b>                            | 45 (41-48)        | 46 (39-49)       | 43 (38-49)         | 45 (40-49)          | 0.821  |
| <b>LAVi, ml/m<sup>2</sup></b>             | 56 (42-78)        | 58 (45-74)       | 57 (43-78)         | 63 (50-81)          | 0.270  |
| <b>E/A</b>                                | 0.87 (0.59-1.94)  | 0.63 (0.53-1.09) | 0.65 (0.52-1.49)   | 0.66 (0.50-1.30)    | 0.269  |
| <b>E/e'</b>                               | 19 (15-25)        | 19 (11-27)       | 19 (15-28)         | 18 (14-24)          | 0.671  |
| <b>AV Vmax,<br/>m/sec</b>                 | 3.30 (2.92-3.64)  | 3.58 (3.21-3.99) | 4.66 (4.25-5.16)*# | 4.80 (4.40-5.32)*#  | <0.001 |
| <b>AV mean PG,<br/>mmHg</b>               | 26 (19-31)        | 29 (25-35)       | 55 (45-68)*#       | 56 (45-71)*#        | <0.001 |
| <b>AVA, cm<sup>2</sup></b>                | 0.59 (0.48-0.69)* | 0.75 (0.63-0.90) | 0.36 (0.28-0.44)*# | 0.55 (0.45-0.66)*\$ | <0.001 |
| <b>AVAi, cm<sup>2</sup>/m<sup>2</sup></b> | 0.40 (0.35-0.49)* | 0.51 (0.47-0.63) | 0.27 (0.20-0.31)*# | 0.38 (0.31-0.46)*\$ | <0.001 |
| <b>TR velocity,<br/>m/s</b>               | 2.65 (2.30-3.07)  | 2.55 (2.29-2.93) | 2.69 (2.29-3.24)   | 2.74 (2.35-3.03)    | 0.601  |
| <b>TAPSE, mm</b>                          | 15 (12-17)        | 17 (14-23)       | 16 (12-20)         | 17 (15-21)          | 0.047  |
| <b>S', cm/sec</b>                         | 8 (7-9)           | 11 (9-12)        | 7 (6-10)           | 10 (9-11)           | 0.013  |
| <b>FAC, %</b>                             | 35 (23-40)        | 39 (36-46)       | 38 (30-52)         | 44 (38-47)          | 0.074  |
| <b>LVGLS, %</b>                           | 5.4 (4.1-7.0)     | 7.6 (5.1-9.8)    | 6.0 (4.8-8.5)      | 8.7 (6.8-12.0)#\$   | <0.001 |
| <b>AR<br/>≥moderate,<br/>n (%)</b>        | 12 (23)           | 8 (17)           | 3 (6)              | 16 (21)             | 0.084  |
| <b>MR<br/>≥moderate,<br/>n (%)</b>        | 20 (39)           | 8 (17)           | 11(22)             | 13 (17)#            | 0.021  |
| <b>TR<br/>≥moderate,</b>                  | 10 (19)           | 4 (8)            | 4 (8)              | 13 (17)             | 0.191  |

|       |  |  |  |  |  |
|-------|--|--|--|--|--|
| n (%) |  |  |  |  |  |
|-------|--|--|--|--|--|

Continuous variables are expressed as median (interquartile range).

\* p<0.008 for NFLG

# p<0.008 for LFLG

\$ p<0.008 for LFHG

AF, atrial fibrillation; AR, aortic regurgitation; AV, aortic valve; AVA, aortic valve area; AVAi, aortic valve area index; BNP, B-type natriuretic peptide; BSA, body surface area; CAD, coronary artery disease; CHF, congestive heart failure; FAC, fractional area change; GLS, global longitudinal strain; HG, high-gradient; LAD, left atrial dimension; LAVi, left atrial volume index; LF, low-flow; LG, low-gradient; LV, left ventricular; LVEDV, left ventricular end-diastolic volume; LVEF, left ventricular ejection fraction; LVESV, left ventricular end-systolic volume; LVSVi, left ventricular stroke volume index; MI, myocardial infarction; MR, mitral regurgitation; NF, normal-flow; NYHA, New York Heart Association; PG, pressure gradient; STS PROM, Society of Thoracic Surgeons predicted risk of mortality; TAVI, transcatheter aortic valve implantation; TAPSE, tricuspid annular plane systolic excursion; TR, tricuspid regurgitation; Vmax, peak aortic valve velocity.

**Table S2. Characteristics and echocardiographic variables according to the flow and gradient state in preserved LVEF (N=1,515).**

|                                 | <b>LF-LG</b><br>N =91 (6%) | <b>NF-LG</b><br>N=295 (20%) | <b>LF-HG</b><br>N=140 (9%) | <b>NF-HG</b><br>N=989 (65%) | <b>P-</b><br><b>value</b> |
|---------------------------------|----------------------------|-----------------------------|----------------------------|-----------------------------|---------------------------|
| <b>Age, years</b>               | 84 (81-87)                 | 84 (81-87)                  | 85 (82-88)*                | 85 (81-88)                  | 0.017                     |
| <b>Male sex, n (%)</b>          | 36 (40)                    | 90 (31)                     | 40 (29)                    | 329 (33)                    | 0.282                     |
| <b>BSA, cm<sup>2</sup></b>      | 1.51 (1.36-1.63)           | 1.43 (1.33-1.59)            | 1.45 (1.34-1.59)           | 1.43 (1.32-1.56) #          | 0.017                     |
| <b>STS PROM, %</b>              | 5.9 (4.2-8.2)              | 5.3 (3.8-7.5)               | 5.6 (4.0-7.4)              | 5.6 (4.0-7.9)               | 0.284                     |
| <b>NYHA class III/IV, n (%)</b> | 37 (41)                    | 82 (28)                     | 57 (41)*                   | 286 (29)\$                  | 0.004                     |
| <b>Hemoglobin, g/dl</b>         | 11.6 (10.5-13.0)           | 11.3 (10.3-12.4)            | 11.7 (10.4-12.8)           | 11.2 (10.1-12.3)            | 0.018                     |
| <b>BNP, pg/ml</b>               | 249 (146-441)*             | 147 (70-304)                | 285 (130-534)*             | 207 (99-461)*               | <0.001                    |
| <b>AF, n (%)</b>                | 39 (43)*                   | 35 (12)                     | 38 (27)*                   | 79 (8)\$#                   | <0.001                    |
| <b>CHF, n (%)</b>               | 58/91 (64)*                | 123/295 (42)                | 91/140 (65)*               | 573/985 (58)*               | <0.001                    |
| <b>CAD, n (%)</b>               | 33/91 (36)                 | 103/295 (35)                | 42/140 (30)                | 270/988 (27)                | 0.038                     |
| <b>Prior MI, n (%)</b>          | 9/91 (10)                  | 15/295 (5)                  | 2/140 (1)#                 | 32/987 (3)#                 | 0.004                     |
| <b>LVEDV, ml</b>                | 66 (53-85)                 | 74 (62-92)                  | 66 (52-82)*                | 79 (64-98)*#\$\$            | <0.001                    |
| <b>LVESV, ml</b>                | 25 (17-34)                 | 24 (19-32)                  | 24 (17-31)                 | 27 (20-35)*\$               | <0.001                    |
| <b>LVEF, %</b>                  | 63 (55-68)*                | 65 (60-70)                  | 64 (60-69)                 | 65 (60-69)#                 | 0.001                     |
| <b>LVSVi, ml/m<sup>2</sup></b>  | 30 (27-33)*                | 47 (41-55)                  | 31 (28-33)*                | 50 (43-58)*#\$\$            | <0.001                    |
| <b>LV mass</b>                  | 92 (76-114)                | 99 (81-120)                 | 120 (96-143)*#             | 121 (101-148)*#             | <0.001                    |

|                                           |                   |                  |                    |                     |        |
|-------------------------------------------|-------------------|------------------|--------------------|---------------------|--------|
| <b>index, g/m<sup>2</sup></b>             |                   |                  |                    |                     |        |
| <b>LAD, mm</b>                            | 45 (40-50)*       | 42 (37-45)       | 43 (38-48)*        | 42 (37-46)#         | <0.001 |
| <b>LAVi, ml/m<sup>2</sup></b>             | 52 (38-73)        | 50 (38-64)       | 58 (39-75)         | 52 (41-64)          | 0.058  |
| <b>E/A</b>                                | 0.66 (0.55-0.79)  | 0.68 (0.59-0.86) | 0.64 (0.52-0.80)   | 0.67 (0.55-0.82)    | 0.059  |
| <b>E/e'</b>                               | 15 (12-19)        | 16 (12-22)       | 17 (12-22)         | 18 (14-23)*#        | <0.001 |
| <b>AV Vmax,<br/>m/sec</b>                 | 3.60 (3.20-3.90)  | 3.88 (3.52-4.06) | 4.60 (4.30-5.01)*# | 4.80(4.40-5.25)#*   | <0.001 |
| <b>AV mean PG,<br/>mmHg</b>               | 30 (23-34)        | 33 (28-37)       | 50 (44-63)#*       | 55 (46-67)#*        | <0.001 |
| <b>AVA, cm<sup>2</sup></b>                | 0.63 (0.53-0.71)* | 0.76 (0.67-0.86) | 0.45 (0.37-0.55)*# | 0.62 (0.52-0.74)*\$ | <0.001 |
| <b>AVAi, cm<sup>2</sup>/m<sup>2</sup></b> | 0.41 (0.36-0.50)* | 0.51 (0.45-0.60) | 0.31 (0.26-0.37)*# | 0.43 (0.36-0.50)*\$ | <0.001 |
| <b>TR velocity,<br/>m/s</b>               | 2.55 (2.23-2.87)  | 2.50 (2.28-2.77) | 2.53 (2.29-3.00)   | 2.55 (2.30-2.83)    | 0.278  |
| <b>TAPSE, mm</b>                          | 15 (13-20)*       | 20 (17-23)       | 17 (14-21)*        | 20 (18-22)\$#       | <0.001 |
| <b>S', cm/sec</b>                         | 10 (7-12)         | 11 (9-13)        | 10 (8-12)          | 11 (9-13)\$         | 0.025  |
| <b>FAC, %</b>                             | 36 (28-43)        | 44 (39-49)       | 41 (34-46)         | 44 (40-50)#         | 0.002  |
| <b>LVGLS, %</b>                           | 11.7 (8.4-15.0)*  | 14.5 (11.0-17.0) | 11.5 (8.2-13.5)*   | 12.7 (10.0-15.7)*\$ | <0.001 |
| <b>AR<br/>≥moderate,<br/>n (%)</b>        | 9 (10)            | 31 (11)          | 14 (10)            | 127 (13)            | 0.531  |
| <b>MR<br/>≥moderate,<br/>n (%)</b>        | 14 (15)           | 36 (12)          | 25 (18)            | 76 (8)\$            | <0.001 |
| <b>TR<br/>≥moderate,</b>                  | 16 (18)           | 32 (11)          | 25 (18)            | 69 (7)#\$           | <0.001 |

|       |  |  |  |  |  |
|-------|--|--|--|--|--|
| n (%) |  |  |  |  |  |
|-------|--|--|--|--|--|

Continuous variables are expressed as median (interquartile range).

\* p<0.008 for NFLG

# p<0.008 for LFLG

\$ p<0.008 for LFHG

AF, atrial fibrillation; AR, aortic regurgitation; AV, aortic valve; AVA, aortic valve area; AVAi, aortic valve area index; BNP, B-type natriuretic peptide; BSA, body surface area; CAD, coronary artery disease; CHF, congestive heart failure; FAC, fractional area change; GLS, global longitudinal strain; HG, high-gradient; LAD, left atrial dimension; LAVi, left atrial volume index; LF, low-flow; LG, low-gradient; LV, left ventricular; LVEDV, left ventricular end-diastolic volume; LVEF, left ventricular ejection fraction; LVESV, left ventricular end-systolic volume; LVSVi, left ventricular stroke volume index; MI, myocardial infarction; MR, mitral regurgitation; NF, normal-flow; NYHA, New York Heart Association; PG, pressure gradient; STS PROM, Society of Thoracic Surgeons predicted risk of mortality; TAVI, transcatheter aortic valve implantation; TAPSE, tricuspid annular plane systolic excursion; TR, tricuspid regurgitation; Vmax, peak aortic valve velocity.

**Table S3. Details of events (N=1,742).**

|                                                                                    | <b>All patients</b> |
|------------------------------------------------------------------------------------|---------------------|
| <b>Cardiovascular death and rehospitalization for cardiovascular events, n (%)</b> | 301 (17)            |
| <b>Cardiovascular death, n (%)</b>                                                 | 86 (5)              |
| <b>Rehospitalization for cardiovascular events, n (%)</b>                          | 254 (15)            |
| Congestive heart failure                                                           | 131 (8)             |
| Arrhythmia                                                                         | 47 (3)              |
| Newly developed coronary artery disease                                            | 18 (1)              |
| TAVI valve related                                                                 | 19 (1)              |
| Ischemic stroke                                                                    | 46 (3)              |
| Hemorrhage stroke                                                                  | 5 (0.3)             |
| New device implantation after discharge*                                           | 33 (2)              |
| <b>All-cause death, n (%)</b>                                                      | 290 (17)            |

TAVI, transcatheter aortic valve implantation.

\* All patients underwent permanent pacemaker implantation.



**Table S4. Model for the composite outcome in the subgroup with GLS evaluation (N=993).**

|                                          | <b>Multivariable</b> |                |
|------------------------------------------|----------------------|----------------|
|                                          | <b>HR (95%CI)</b>    | <b>P-value</b> |
| <b>Prior cardiac surgery</b>             | 1.97 (1.22-3.18)     | 0.005          |
| <b>AF</b>                                | 1.89 (1.18-3.03)     | 0.008          |
| <b>NYHA class III/IV</b>                 | 1.46 (1.02-2.08)     | 0.040          |
| <b>STS PROM, %</b>                       | 1.02 (1.00-1.05)     | 0.048          |
| <b>Low-gradient: mean PG &lt;40 mmHg</b> | 1.67 (1.17-2.39)     | 0.005          |
| <b>LVGLS</b>                             | 0.95 (0.92-0.99)     | 0.019          |

AF, atrial fibrillation; CI, confidence interval; GLS, global longitudinal strain; HR, hazard ratio; LV, left ventricular; NYHA, New York Heart Association; PG, pressure gradient; STS PROM, Society of Thoracic Surgeons risk score risk of mortality.

**Figure S1. Impact of flow-gradient patterns on the secondary outcome in severe AS after TAVI (N=1,742).**

**A**

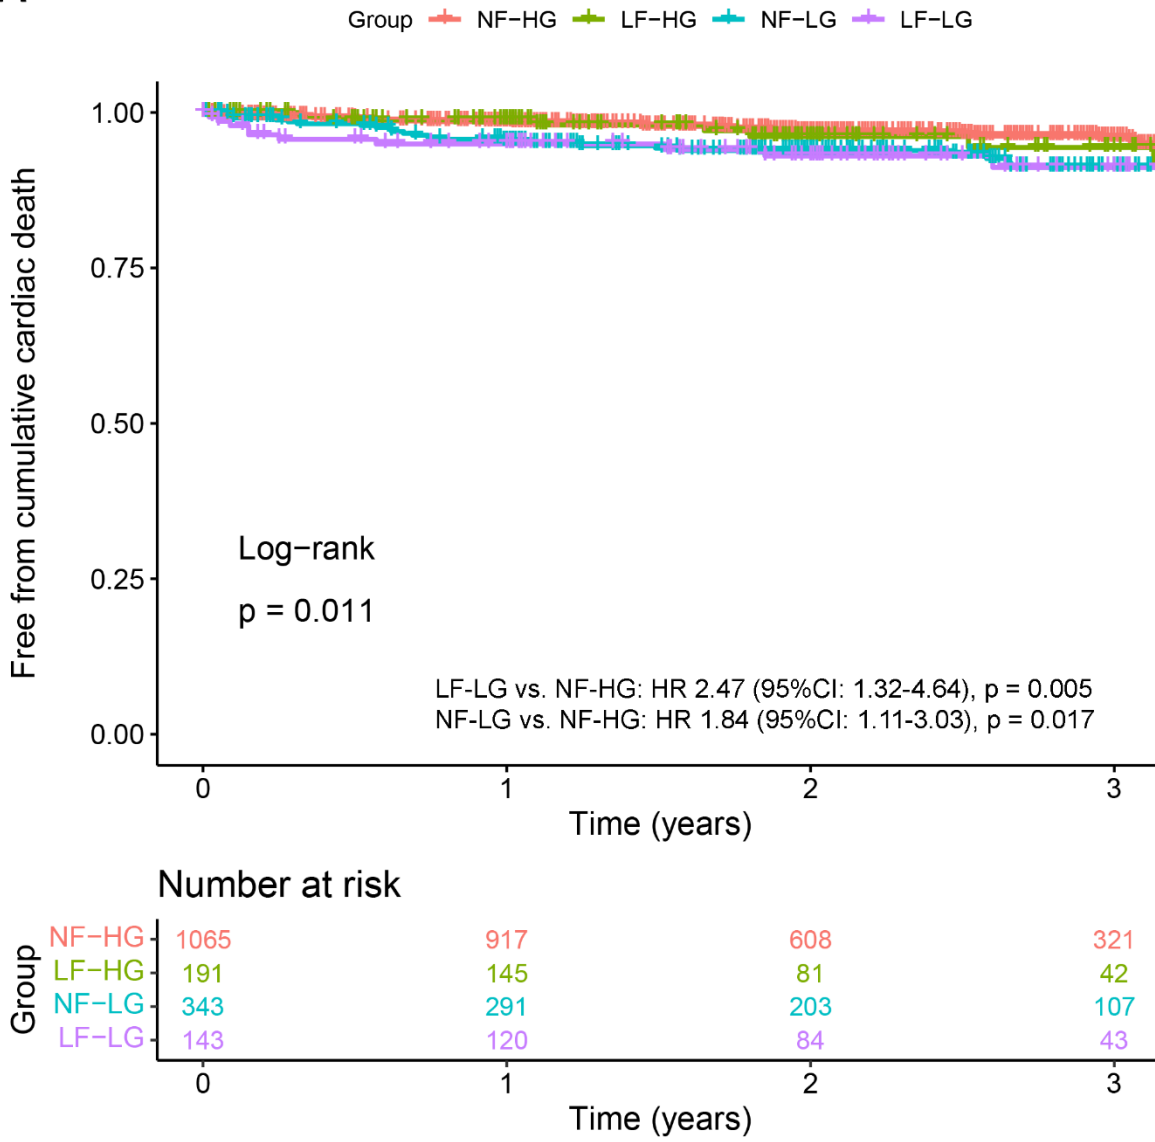

**B**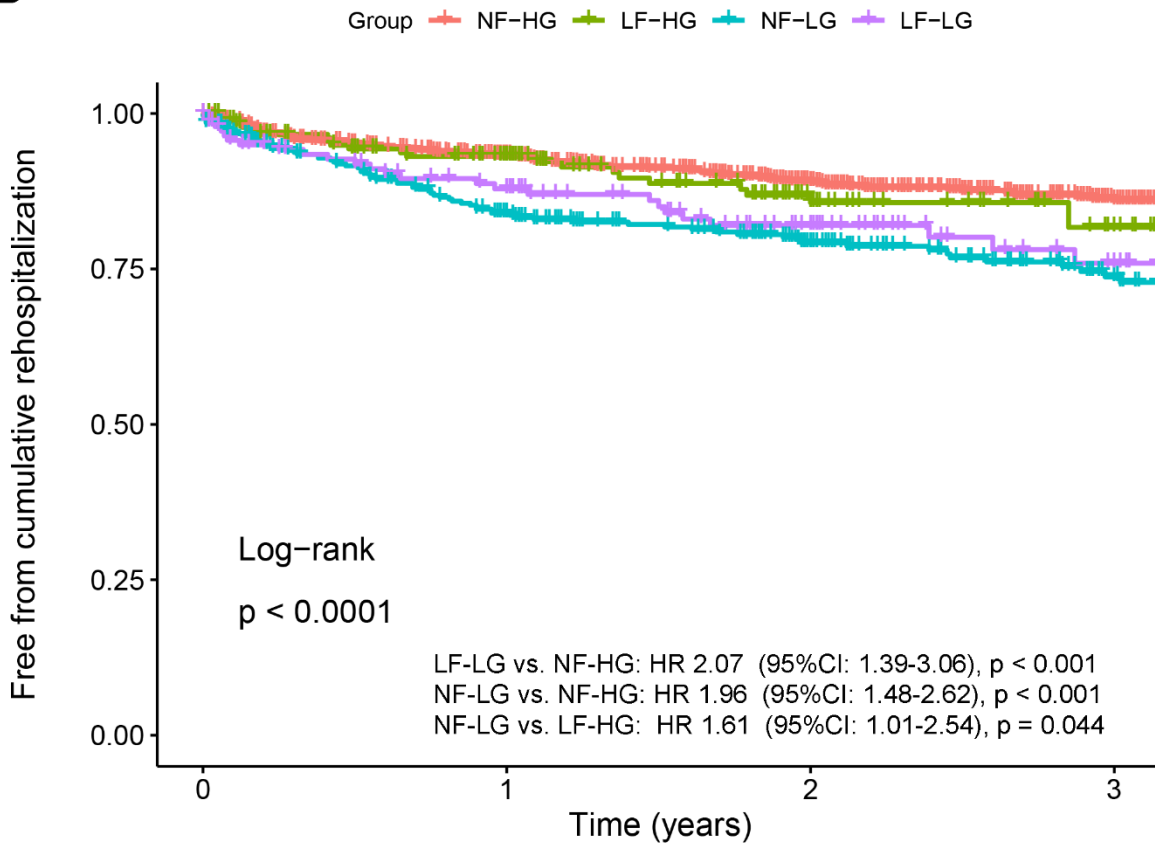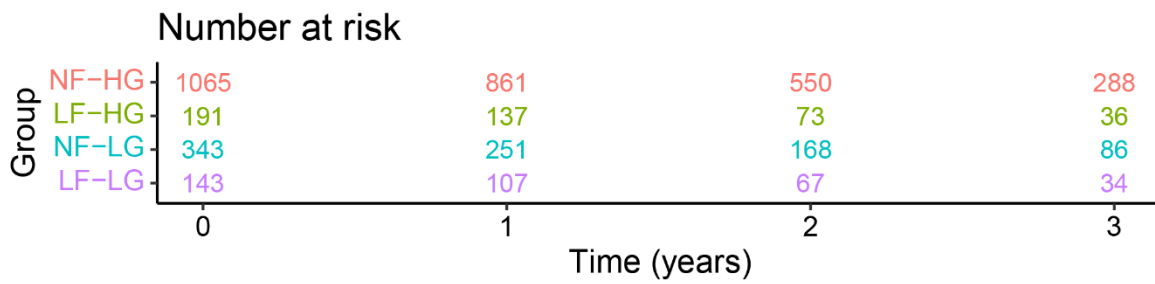

C

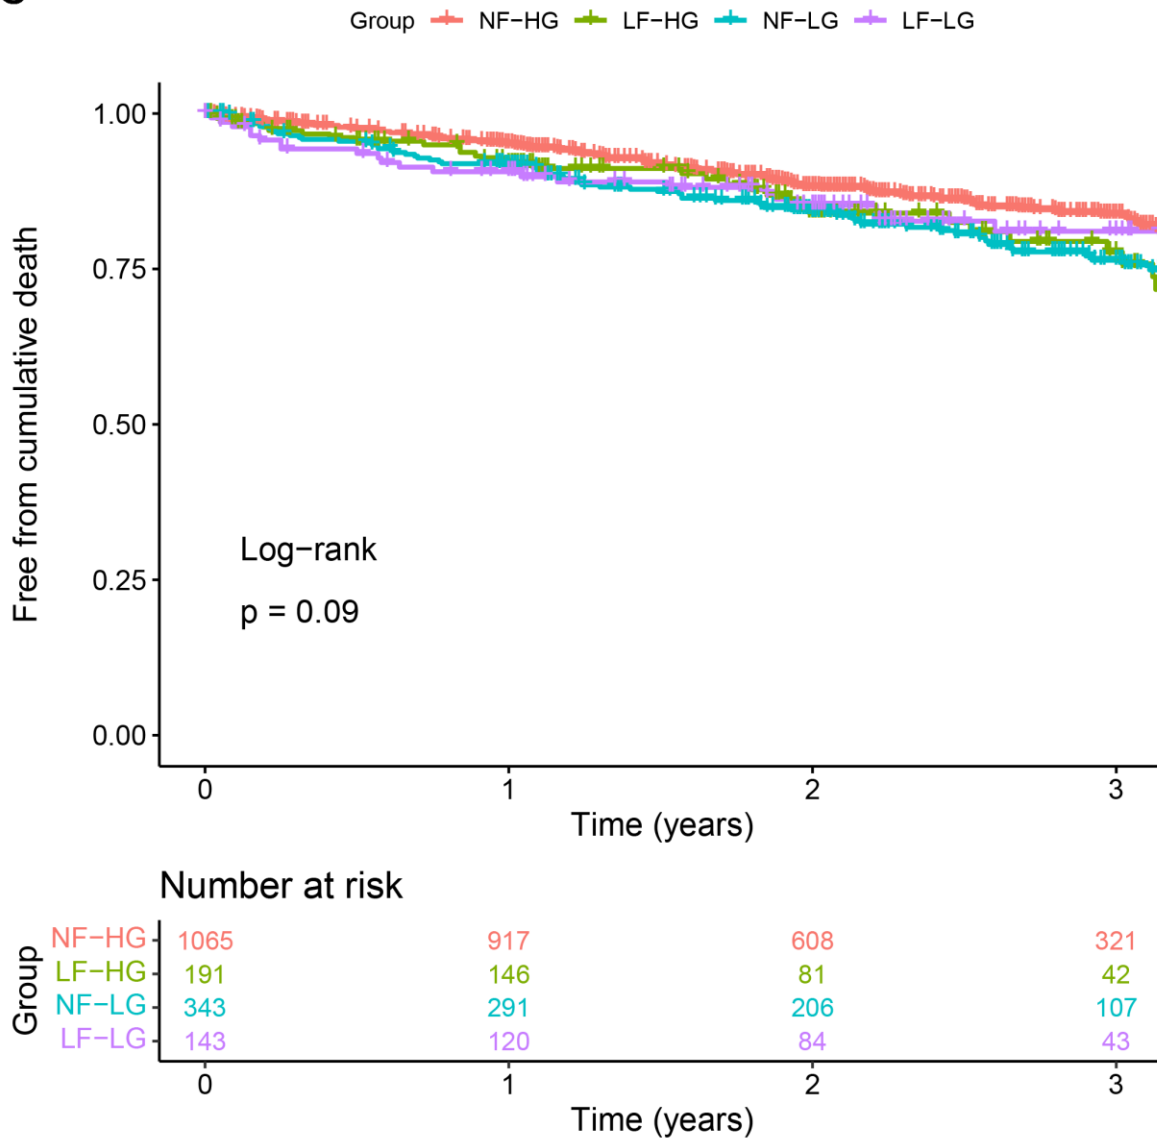

Kaplan–Meier curves demonstrate freedom from cumulative cardiovascular death (A), rehospitalization for cardiovascular events (B), and all-cause death (C) in our study population stratified by the pressure gradient and flow status. Three-year event-free survival rates for secondary outcome in each groups are as follows: cardiac death, LF-LG 91.2% (95% CI: 85.7–97.0), NF-LG 91.2% (95% CI: 87.5–94.9), LF-HG 94.4% (95% CI: 89.7–99.3), and NF-HG 95.9% (95% CI: 94.5–97.4); cardiovascular rehospitalization, LF-LG 75.9% (95% CI: 67.2–85.7), NF-LG 73.7% (95% CI: 68.3–79.6), LF-HG 81.7% (95% CI: 74.1–90.0), and NF-HG 86.0% (95% CI: 83.4–88.6); and all-cause death, LF-LG 81.1% (95% CI: 73.9–88.9), NF-LG 76.4% (95% CI: 71.2–82.0), LF-HG 77.6% (95% CI: 69.8–86.4), and NF-HG 83.8% (95% CI: 81.1–86.6). NF-HF, normal-flow, high-gradient; LF-HG, low-flow, high-gradient; NF-LG, normal-flow, low-gradient; LF-LG, low-flow, low-gradient; TAVI, transcatheter aortic valve implantation; AS, aortic stenosis; HR, hazard ratio; CI, confidence interval.

**Figure S2. Impact of flow-gradient patterns on the secondary outcome according to baseline EF.**

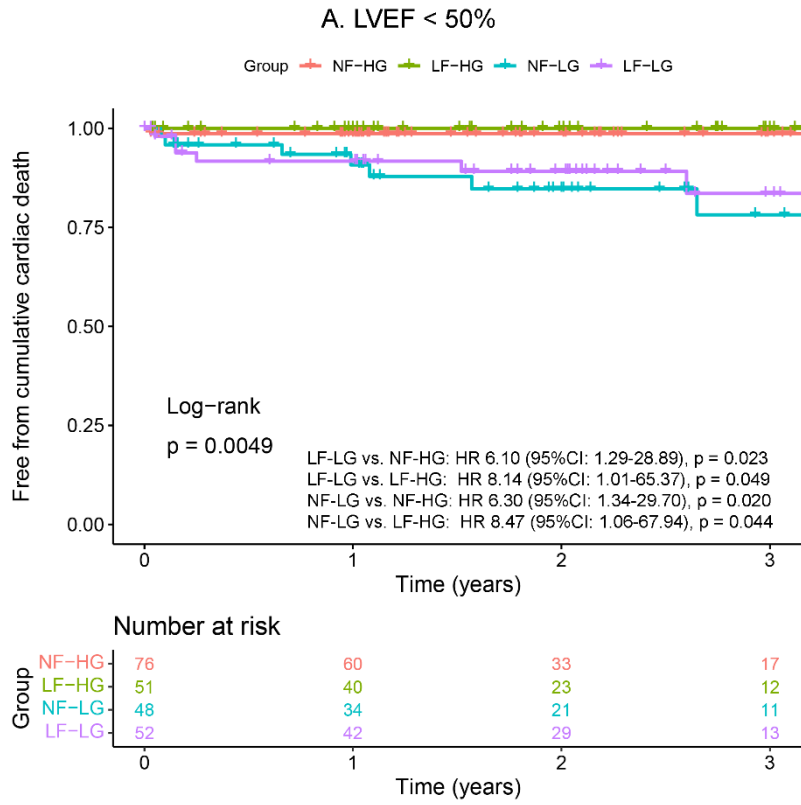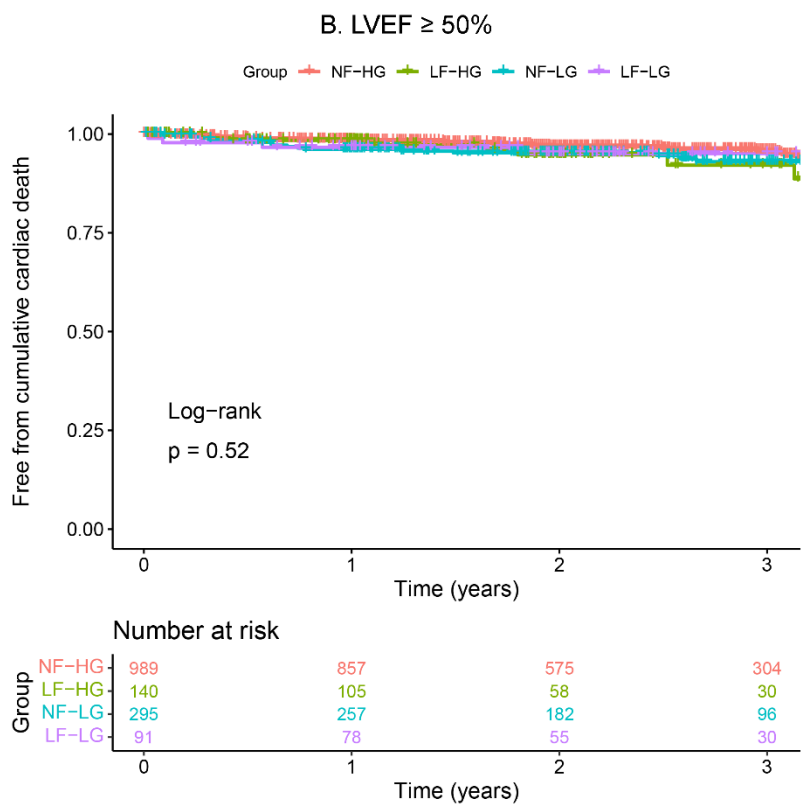

### C. LVEF < 50%

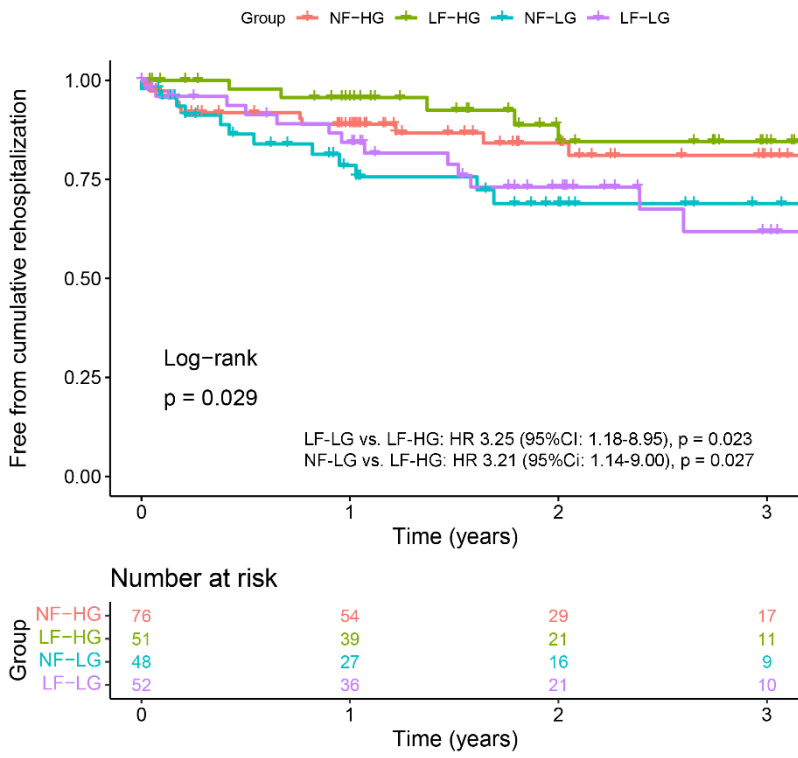

### D. LVEF ≥ 50%

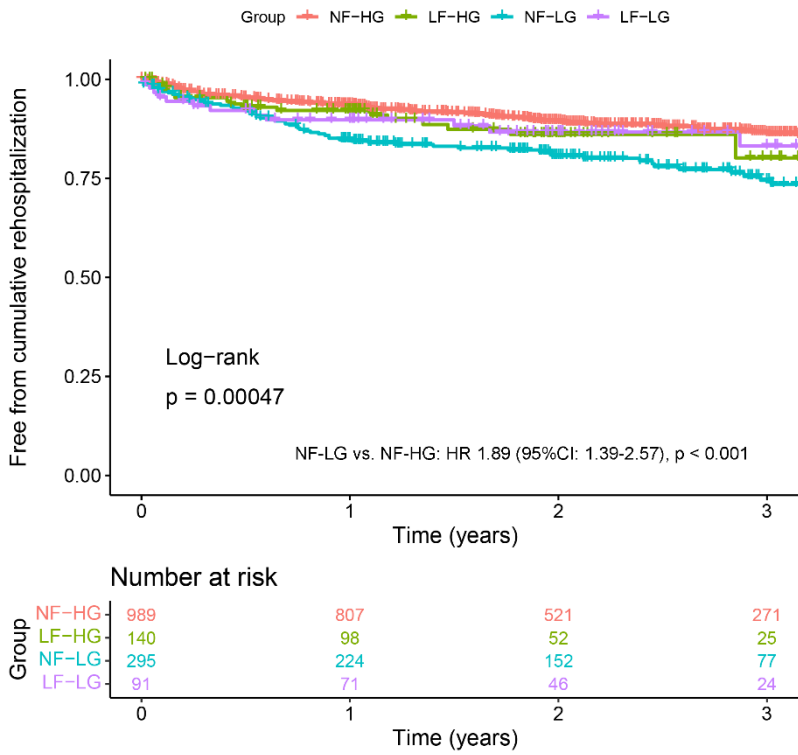

**E. LVEF < 50%**

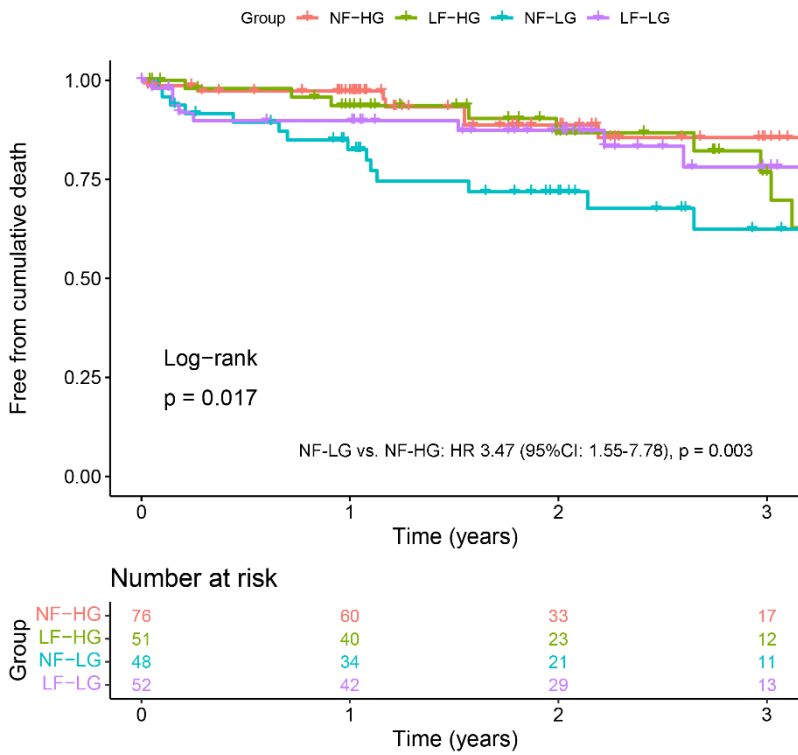

**F. LVEF ≥ 50%**

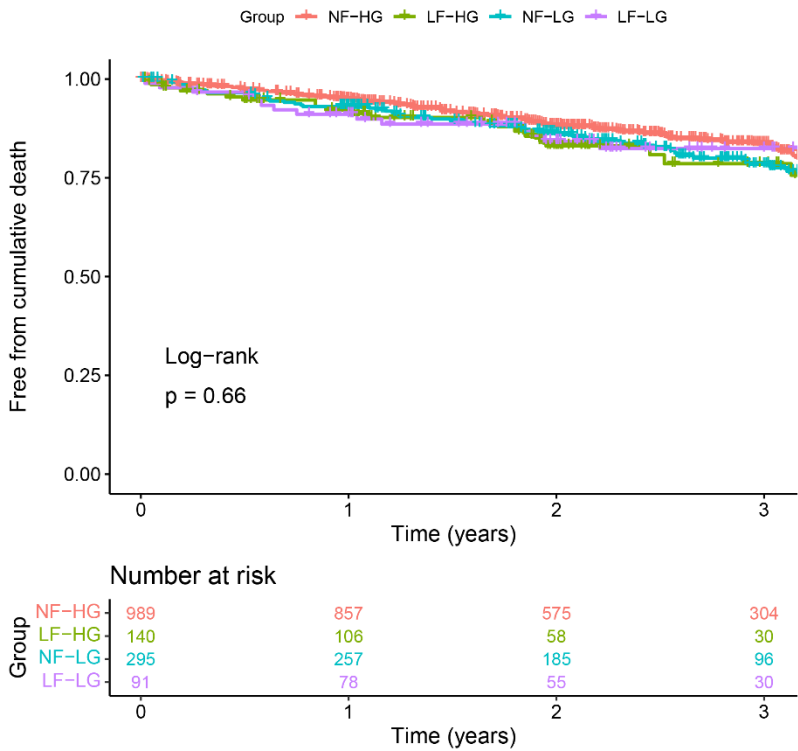

Survival analysis was performed separately for reduced (N=227) and preserved EF (N=1,515). Kaplan-Meier curves demonstrate freedom from cumulative cardiovascular death (A, B),

rehospitalization for cardiovascular events (C, D), and all-cause death (E, F) in our study population stratified by the pressure gradient and flow status. LV, left ventricular; EF, ejection fraction; NF-HF, normal-flow, high-gradient; LF-HG, low-flow, high-gradient; NF-LG, normal-flow, low-gradient; LF-LG, low-flow, low-gradient; HR, hazard ratio; CI, confidence interval.



**Figure S3. Estimated cumulative incidence curves of the primary endpoint (N=1,742).**

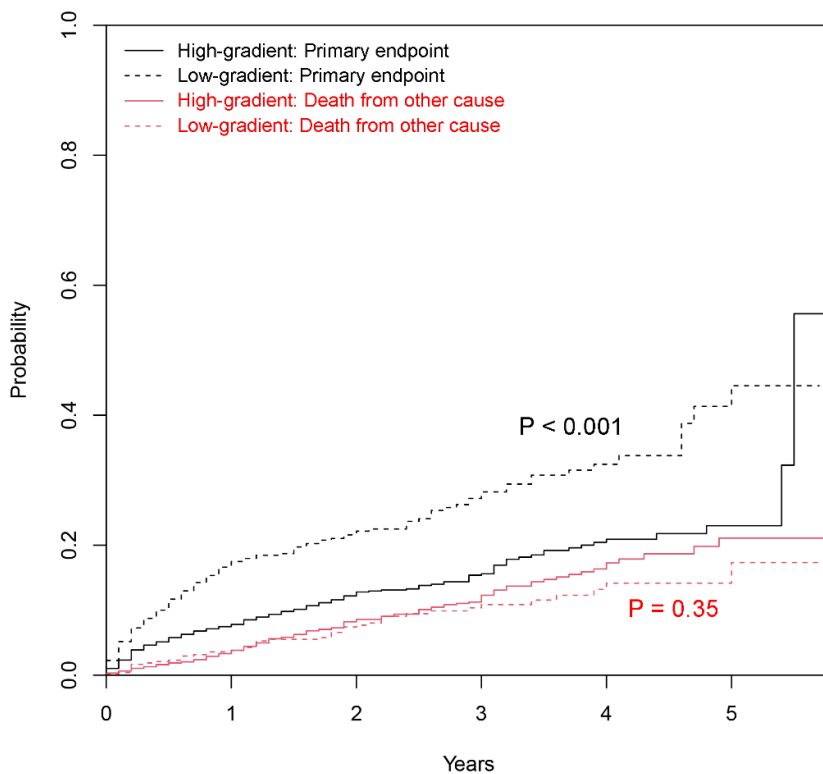

Patients were stratified according to the pressure gradient ( $<40$  mmHg, low gradient;  $\geq 40$  mmHg, high gradient), and the cumulative probability of events was calculated separately for both events. The black line shows the cumulative incidence curves of the primary endpoint, composite of cardiovascular death, and rehospitalization for cardiovascular events, whereas the red line shows the cumulative incidence of mortality due to other causes. Patients with low-gradient show a significantly higher probability of the primary endpoint than those with high-gradient. There is no significant difference in the probability of competing events of all-cause death.

**Figure S4. Estimated cumulative incidence curves of the primary endpoint.**

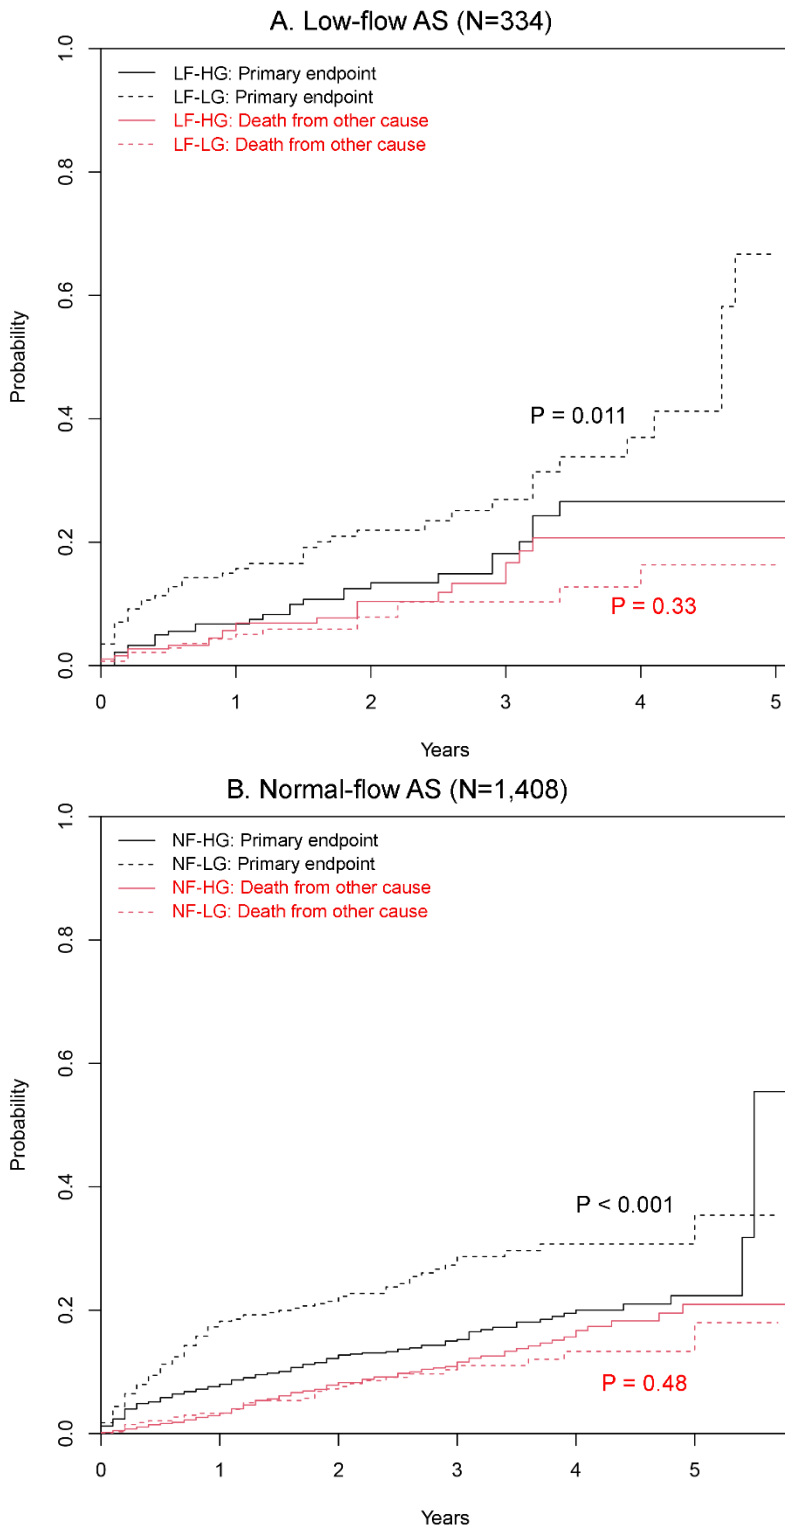

A) LF-AS (N=334) and B) NF-AS (N=1,408). Patients were stratified according to the pressure gradient (<40 mmHg, low gradient;  $\geq$ 40 mmHg, high gradient), and the cumulative probability of events was calculated separately for both events. The black line shows the cumulative incidence curves

of the primary endpoint, composite of cardiovascular death, and rehospitalization for cardiovascular events, and the red line shows the cumulative incidence of mortality due to other causes. Low-gradient patients show a significantly higher probability of the primary endpoint than high-gradient patients among both low-flow and normal-flow AS patients. There are no significant differences in the probability of competing events for all-cause death. AS, aortic stenosis; HG, high-gradient; LF, low-flow; LG, low-gradient; NF, normal-flow.

**Figure S5. Changes in LV and AV parameters after TAVI according to the pressure gradient in patients with preserved EF and reduced EF (N=1,239).**

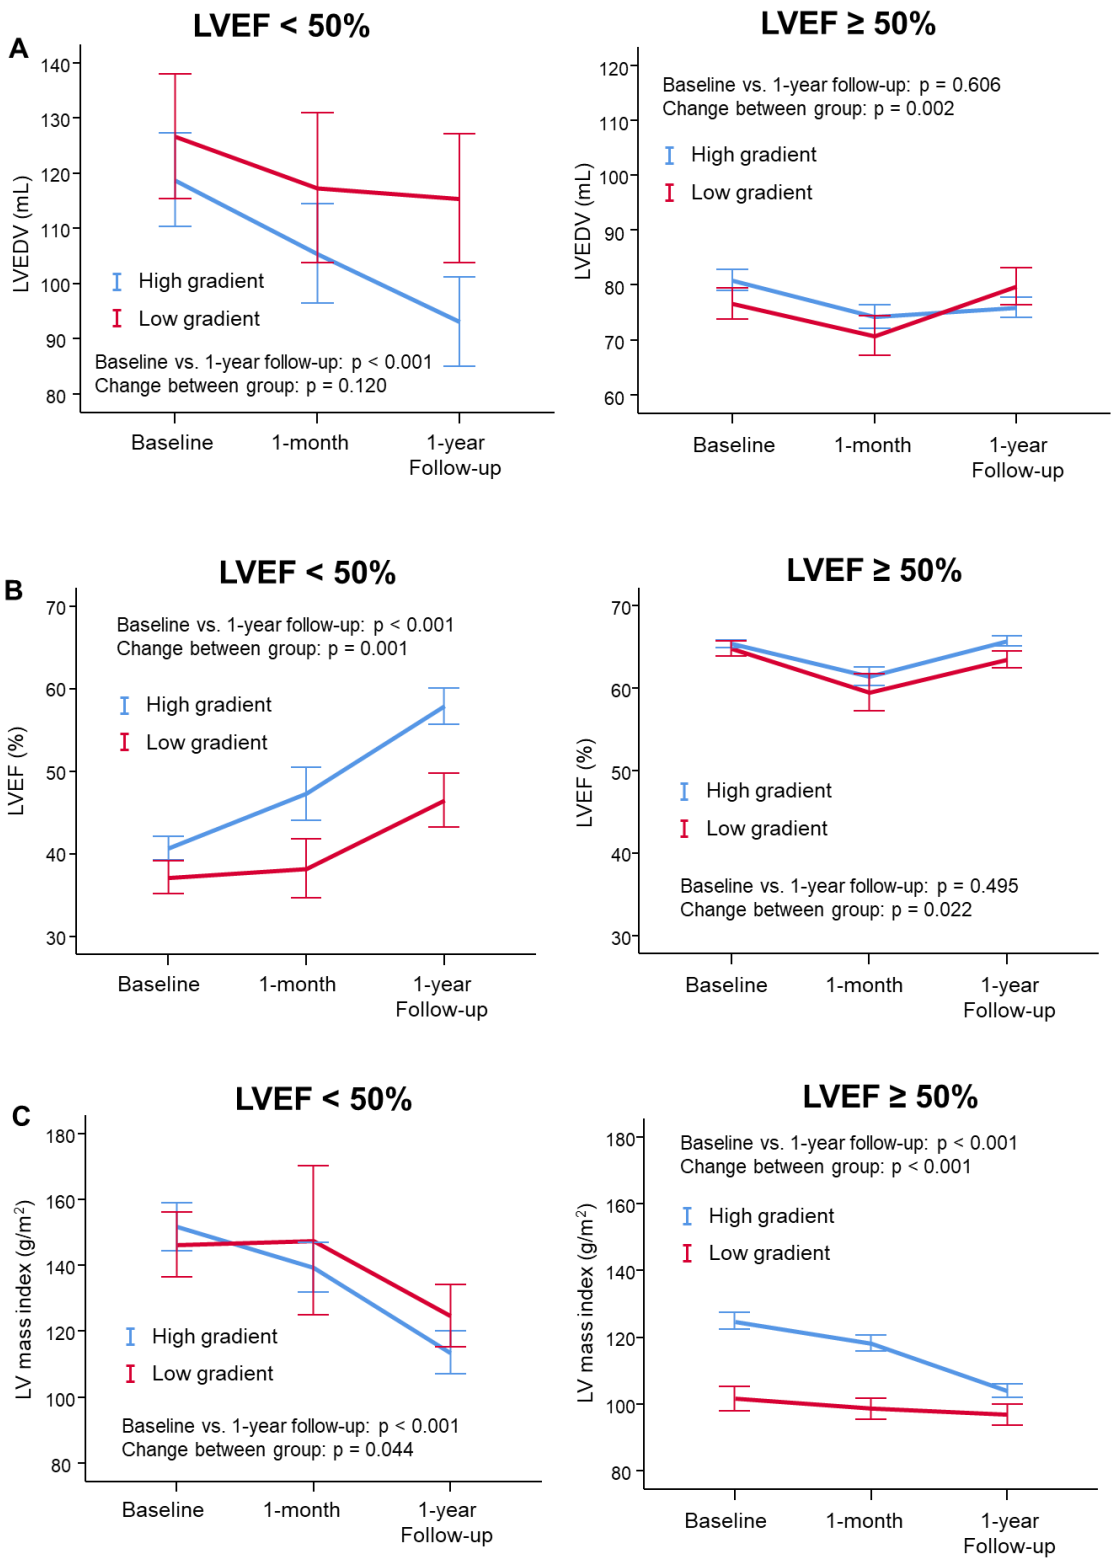

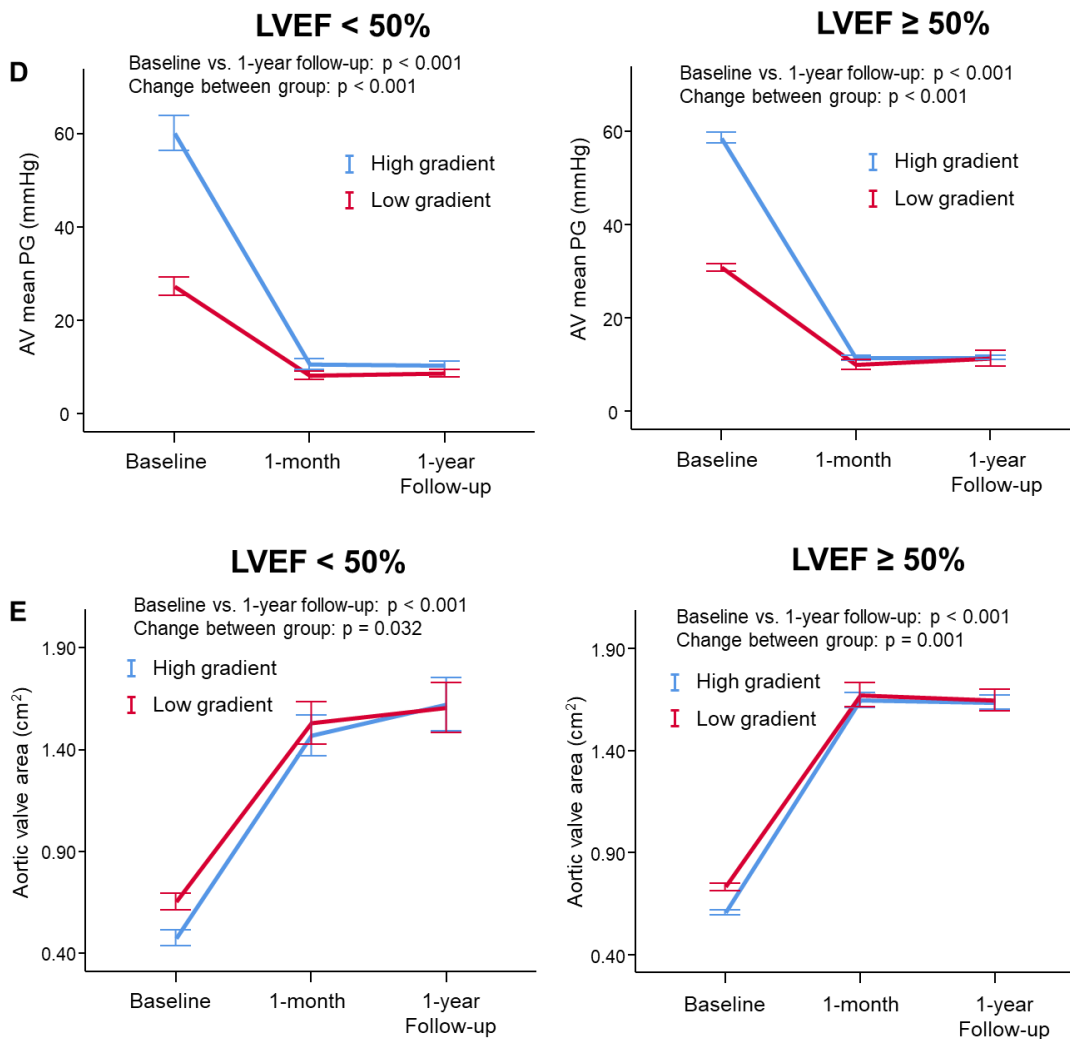

Changes in the LVEDV (A), LVEF (B), LV mass index (C), AV mean pressure gradient (D), and aortic valve area (E) between low-gradient and high-gradient AS. Data were analyzed separately for preserved and reduced EF. Markers represent the median of the observed data obtained before TAVI, at 1-month, and at the 1-year follow-up. Error bars represent 95% confidence intervals. The mixed model was constructed with patient groups, changes over time, and interactions between groups and changes. P-values for changes over time and differences in the magnitude of change between groups are shown as “Baseline vs. 1-year follow-up” and “Change between groups,” respectively.

AS, aortic stenosis; AV, aortic valve; EF, ejection fraction; LV, left ventricular; LVEDV, left ventricular end-diastolic volume; TAVI, transcatheter aortic valve implantation.
